# Supplementary material for: Defining high bleeding risk in patients undergoing percutaneous coronary intervention: a consensus document from the Academic Research Consortium for High Bleeding Risk
Source: PubMed Central journal article supplement — Eur Heart J. 2019 May 22;40(31):2632–53. doi: 10.1093/eurheartj/ehz372 (PMC6736433; doi:10.1093/eurheartj/ehz372), 2019-05-22
Supplement: ehz372_supplementary_data.pdf [file ehz372_supplementary_data.pdf]

## **SUPPLEMENTAL MATERIAL**

### **Defining high bleeding risk in patients undergoing percutaneous coronary intervention – a consensus document from the Academic Research Consortium for High Bleeding Risk**

**Authors:** Philip Urban et al. on behalf of the Academic Research Consortium for High  
Bleeding Risk

## **Table of contents**

Page 2. Academic research consortium-high bleeding risk (ARC-HBR) participants

Page 7. Supplementary table 1. Key patient-related characteristics and exclusion criteria in pivotal randomized trials of DES submitted for FDA review

Page 9. Supplementary table 2. Inclusion criteria in completed and selected ongoing trials in patients at increased bleeding risk

Page 11. Supplementary table 3. One-year bleeding rates according to inclusion criterion in the LEADERS FREE trial

Page 13. Supplementary table 4. Variables in scores to assess long-term bleeding risk in patients taking antiplatelet therapy

Page 15. Supplementary table 5. Recent large non-randomized head-to-head comparisons of OAC therapies

Page 16. Supplementary table 6. Risk factors for bleeding specific to cancer patients

Page 17. Bleeding definitions referred to in the manuscript

Page 24. References

## **Academic research consortium-high bleeding risk (ARC-HBR) participants**

Focus Group members

Philip Urban MD, La Tour hospital, Geneva, Switzerland (PU) and Cardiovascular European Research Center (CERC), Massy, France

Roxana Mehran MD, Icahn School of Medicine at Mount Sinai, New York, USA and Cardiovascular Research Foundation, New York, USA

Roisin Colleran MB BCh, Deutsches Herzzentrum München, Technische Universität München, Munich, Germany

Dominick J. Angiolillo MD PhD, Division of Cardiology, University of Florida College of Medicine, Jacksonville, Florida, USA

Robert A. Byrne MB BCh PhD, Deutsches Herzzentrum München, Technische Universität München, Munich, Germany and DZHK (German Centre for Cardiovascular Research), partner site Munich Heart Alliance Munich, Germany

Davide Capodanno MD PhD, Cardio-Thoracic-Vascular Department, Centro Alte Specialità e Trapianti; A.O.U. "Vittorio Emanuele-Policlinico", University of Catania, Catania, Italy

Thomas Cuisset MD PhD, Département de Cardiologie, CHU Timone and Inserm, Inra, C2VN, Faculté de Médecine, Aix-Marseille Université, Marseille, France

Donald Cutlip MD, Cardiology Division, Beth Israel Deaconess Medical Center, Harvard Medical School, Boston Massachusetts, USA

Pedro Eerdmans MD PhD MSc, Head of the Notified Body, DEKRA Certification B.V.

John Eikelboom MBBS MSc, McMaster University Department of Medicine, Hamilton, Canada

Andrew Farb MD, U.S. Food and Drug Administration

C. Michael Gibson MS MD, Baim Institute for Clinical Research, Brookline, Massachusetts, USA and Harvard Medical School Boston, Massachusetts, USA

John Gregson PhD, London School of Hygiene and Tropical Medicine, London, UK

Michael Haude MD, Städtische Kliniken Neuss. Lukaskrankenhaus GmbH, Neuss, Germany

Stefan K. James MD PhD, Department of Medical Sciences and Uppsala Clinical Research Center, Uppsala University, Uppsala, Sweden

Hyo-Soo Kim MD PhD, Cardiovascular Center, Seoul National University Hospital, Korea

Takeshi Kimura MD PhD, Department of Cardiovascular Medicine, Kyoto University Graduate School of Medicine, Kyoto, Japan

Akihide Konishi MD, Office of Medical Devices 1, Pharmaceuticals and Medical Devices Agency, Tokyo, Japan

John Laschinger MD, U.S. Food and Drug Administration

Martin B. Leon MD, Cardiovascular Research Foundation, New York, USA and Columbia University Medical Center, New York, USA

P. F. Adrian Magee MD, U.S. Food and Drug Administration

Yoshiaki Mitsutake MD, Office of Medical Devices 1, Pharmaceuticals and Medical Devices Agency, Tokyo, Japan

Darren Mylotte MB BCh MD PhD, University Hospital and National University of Ireland,  
Galway, Ireland

Stuart Pocock PhD, London School of Hygiene and Tropical Medicine, London, UK

Matthew J. Price MD, Scripps Clinic, La Jolla, California, USA

Sunil V. Rao MD, Duke Clinical Research Institute, Durham, NC, USA

Ernest Spitzer MD, Thoraxcenter, Erasmus University Medical Center, Rotterdam, The  
Netherlands and Cardialysis, Clinical Trial Management & Core Laboratories, Rotterdam, The  
Netherlands

Norman Stockbridge MD, U.S. Food and Drug Administration

Marco Valgimigli MD PhD, Department of Cardiology, Inselspital, University of Bern

Olivier Varenne MD PhD, Service de Cardiologie, Hôpital Cochin, APHP, Paris, France and  
Université Paris Descartes, Sorbonne Paris-Cité, Paris, France

Ute Windhoevel PhD, Cardiovascular European Research Center (CERC), Massy, France

Robert W. Yeh MD MSc, Beth Israel Deaconess Medical Center, Boston, MA, USA

Mitchell W. Krucoff MD, Duke Clinical Research Institute, Durham, NC, USA and Duke  
University Medical Center, NC, USA

Marie-Claude Morice MD, Cardiovascular European Research Center (CERC), Massy, France

## **US Food and Drug Administration (FDA) and Japanese Pharmaceuticals and Medical Devices Agency (PMDA) representatives**

Andrew Farb MD (FDA)

Akihide Konishi MD (PMDA)

John Laschinger MD (FDA)

P. F. Adrian Magee MD (FDA)

Yoshiaki Mitsutake MD (PMDA)

Norman Stockbridge MD (FDA)

## **Companies represented from industry**

Abbott Vascular

Alvimedica

Amgen

Astra Zeneca

Biosensors

Biotronik

Boston Scientific

Celonova

Chiesi

Cordis

Daiichi Sankyo

Edwards Lifesciences

Janssen

Medinol

Medtronic

Orbusneich

Portola

Sanofi

Sinomed

Sahajanand Medical Technologies

Terumo

**CERC representatives (logistics)**

Asmah Amrani

Meriem Benkhelifa

**Supplementary table 1. Key patient-related characteristics and exclusion criteria in pivotal randomized trials of DES submitted for FDA review**

| <b>Trial</b>                                       | <b>ENDEAVOR II</b><br>1 | <b>RESOLUTE US</b> <sup>2</sup> | <b>SPIRIT III</b><br>3 | <b>PLATINUM</b><br>4  | <b>EVOLVE II</b><br>5     | <b>BIONICS</b><br>6   | <b>BIOFLOW-V</b><br>7     |
|----------------------------------------------------|-------------------------|---------------------------------|------------------------|-----------------------|---------------------------|-----------------------|---------------------------|
| Investigational device                             | permanent polymer ZES   | permanent polymer ZES           | permanent polymer EES  | permanent polymer EES | bioabsorbable polymer EES | permanent polymer RES | bioabsorbable polymer SES |
| Age, y (mean ± SD)                                 | 62±11                   | 64±10                           | 63±10                  | 64±10                 | 64±10                     | 63±10                 | 65±10                     |
| Upper age limit                                    | not specified           | not specified                   | not specified          | not specified         | not specified             | not specified         | not specified             |
| Advanced renal impairment                          | Cr >2.0 mg/dl           | Cr >2.5 mg/dl                   | Cr >2.5 mg/dl          | CrCl <50 mL/min       | Cr >2.0 mg/dl             | CrCl <30 mL/min       | CrCl <30 mL/min           |
| Bleeding disorders or recent bleeding              | X                       | not specified                   | X                      | X                     | X                         | X                     | X                         |
| Hematological disorders and/or coagulopathy        | X                       | X                               | X                      | X                     | X                         | X                     | X                         |
| Stroke or TIA: exclusion time frame                | <6 months               | <6 months                       | <6 months              | <6 months             | <6 months                 | <6 months             | <6 months                 |
| Contraindications or inability to comply with DAPT | X                       | X                               | X                      | not specified         | X                         | X                     | X                         |
| OAC required                                       | not specified           | not specified                   | X                      | X                     | X                         | not specified         | X                         |
| Likely unable to comply with                       | not specified           | X                               | X                      | X                     | X                         | X                     | X                         |



|               |  |  |  |  |  |  |  |
|---------------|--|--|--|--|--|--|--|
| DAPT protocol |  |  |  |  |  |  |  |
|---------------|--|--|--|--|--|--|--|

Cr = creatinine; Cr Cl = creatinine clearance; DAPT = dual antiplatelet therapy; DES = drug-eluting stent; EES = everolimus-eluting stents; OAC = oral anticoagulation; RES = ridaforolimus -eluting stents; SES = sirolimus-eluting stents; ZES = zotarolimus-eluting stents

X denotes excluded. Inclusion and exclusion criteria were abstracted from the published manuscript reporting the primary results or trial design, the trial registration entry or the trial protocol (according to availability)

**Supplementary table 2. Inclusion criteria in completed and selected ongoing trials in patients at increased bleeding risk**

|                                 | <b>LEADERS<br/>FREE</b><br>8 | <b>ZEUS-HBR</b><br>9 | <b>SENIOR</b><br>10 | <b>MASTER<br/>DAPT</b><br>(NCT03023020) | <b>ONYX ONE</b><br>(NCT03344653) | <b>COBRA<br/>REDUCE</b><br>(NCT02594501) | <b>EVOLVE<br/>SHORT DAPT</b><br>(NCT02605447) | <b>XIENCE 28/<br/>XIENCE 90</b><br>(NCT03355742<br>and<br>NCT03218787) |
|---------------------------------|------------------------------|----------------------|---------------------|-----------------------------------------|----------------------------------|------------------------------------------|-----------------------------------------------|------------------------------------------------------------------------|
| Type of trial                   | RCT<br>(published)           | RCT<br>(published)   | RCT<br>(published)  | RCT<br>(ongoing)                        | RCT<br>(ongoing)                 | RCT<br>(ongoing)                         | Single arm<br>(ongoing)                       | Single arm<br>(ongoing)                                                |
| Age ≥75 (or >80*)               |                              | ✓*                   | ✓                   | ✓                                       | ✓                                |                                          | ✓                                             | ✓                                                                      |
| OAC                             | ✓                            | ✓                    |                     | ✓                                       | ✓                                | ✓                                        | ✓                                             | ✓                                                                      |
| Renal failure                   | ✓                            |                      |                     |                                         | ✓                                |                                          | ✓                                             | ✓                                                                      |
| Liver disease                   | ✓                            |                      |                     | ✓                                       | ✓                                |                                          |                                               |                                                                        |
| Recent cancer                   | ✓                            |                      |                     | ✓                                       | ✓                                |                                          |                                               |                                                                        |
| Anemia or transfusion           | ✓                            | ✓                    |                     | ✓                                       | ✓                                |                                          |                                               | ✓                                                                      |
| Thrombocytopenia                | ✓                            | ✓                    |                     | ✓                                       | ✓                                |                                          | ✓                                             | ✓                                                                      |
| Stroke or ICH                   | ✓                            |                      |                     | ✓                                       | ✓                                |                                          | ✓                                             | ✓                                                                      |
| Actionable bleed                |                              |                      |                     | ✓                                       |                                  |                                          | ✓                                             | ✓                                                                      |
| Hospitalization for<br>bleeding | ✓                            | ✓                    |                     | ✓                                       | ✓                                |                                          |                                               |                                                                        |

|                        |   |   |  |   |   |  |  |  |
|------------------------|---|---|--|---|---|--|--|--|
| NSAID                  | ✓ | ✓ |  | ✓ | ✓ |  |  |  |
| Early planned surgery  | ✓ |   |  |   | ✓ |  |  |  |
| PRECISE-DAPT score >25 |   |   |  | ✓ |   |  |  |  |

ICH = intracranial hemorrhage; NSAIDS = non-steroidal anti-inflammatory drugs; OAC = oral anticoagulation; RCT: randomized controlled trial

\*The lower age cut-off for HBR is  $\geq 75$  years in all trials but ZEUS-HBR (age cut-off  $>80$  years).

**Supplementary table 3. One-year bleeding rates according to inclusion criteria in the LEADERS FREE trial**

| <b>Inclusion criteria*</b>                                    | <b>Patients,<br/>n (%)</b> | <b>Patients with<br/>BARC 3-5<br/>bleeding†,<br/>n (%)</b> |
|---------------------------------------------------------------|----------------------------|------------------------------------------------------------|
| Age $\geq$ 75 years                                           | 1564 (64.3)                | 118 (7.6)                                                  |
| Planned oral anticoagulant after PCI                          | 879 (36.1)                 | 78 (8.9)                                                   |
| Renal insufficiency‡                                          | 464 (19.1)                 | 49 (10.6)                                                  |
| Planned major surgery that would require interruption of DAPT | 398 (16.4)                 | 30 (7.5)                                                   |
| Hemoglobin < 11 g/dL or transfusion during the prior 4 weeks  | 377 (15.5)                 | 61 (16.2)                                                  |
| Non-skin cancer diagnosed or treated during the prior 3 years | 239 (9.8)                  | 23 (9.6)                                                   |
| Expected poor compliance with DAPT for other medical reasons  | 88 (3.6)                   | 4 (4.6)                                                    |
| Hospital admission for bleeding during the prior 12 months    | 79 (3.2)                   | 10 (12.7)                                                  |
| Chronic glucocorticoid- or NSAID-use                          | 72 (3.0)                   | 6 (8.3)                                                    |
| Thrombocytopenia (< 100 x 10 <sup>9</sup> /L)                 | 38 (1.6)                   | 2 (5.3)                                                    |

|                                       |          |          |
|---------------------------------------|----------|----------|
| Any stroke during the prior 12 months | 39 (1.6) | 1 (2.6)  |
| Any prior intra-cerebral bleed        | 33 (1.4) | 2 (6.1)  |
| Severe liver disease§                 | 21 (0.9) | 3 (14.3) |

\* Inclusion criteria are not mutually exclusive (on average, patients met 1.7 criteria).

† according to inclusion criterion

‡ defined as creatinine clearance <40 ml/min

§ history of variceal hemorrhage, presence of ascites, hepatic encephalopathy or jaundice

DAPT = dual antiplatelet therapy; NSAID = non-steroidal anti-inflammatory drug; PCI = percutaneous coronary intervention

**Supplementary table 4. Variables in scores to assess long-term bleeding risk in patients taking antiplatelet therapy**

|                           | REACH<br>11 | Dutch ASA and<br>NSAIDS score<br>12 | DAPT*<br>13 | PARIS<br>14 | PRECISE-DAPT<br>15 | BleeMACS<br>16 |
|---------------------------|-------------|-------------------------------------|-------------|-------------|--------------------|----------------|
| Age                       | ✓           | ✓                                   | ✓           | ✓           | ✓                  | ✓              |
| BMI                       |             | NA                                  |             | ✓           | NA                 | NA             |
| OAC                       | ✓           | ✓                                   | Excluded    | ✓           | Excluded           | Excluded       |
| APT (*DAPT)               | ✓           | ✓                                   | ✓           | NA          | NA                 | NA             |
| Anemia                    | NA          | ✓                                   | NA          | ✓           | ✓                  | ✓              |
| White cell count          | NA          | NA                                  | NA          | NA          | ✓                  | NA             |
| Renal insufficiency       |             | NA                                  | ✓           | ✓           | ✓                  | ✓              |
| Prior bleed               | NA          | NA                                  | NA          | NA          | ✓                  | ✓              |
| Diabetes                  | ✓           | ✓                                   |             |             |                    |                |
| Current smoking           | ✓           | NA                                  |             | ✓           |                    |                |
| Hypertension              | ✓           | NA                                  | ✓           |             |                    | ✓              |
| Hypercholesterolemia      | ✓           | NA                                  | NA          |             |                    |                |
| Peripheral artery disease | ✓           | NA                                  | ✓           |             | NA                 | ✓              |
| Chronic heart failure     | ✓           | NA                                  |             | NA          | NA                 |                |

|                         |    |    |  |    |    |   |
|-------------------------|----|----|--|----|----|---|
| <b>Prior malignancy</b> | NA | NA |  | NA | NA | ✓ |
|-------------------------|----|----|--|----|----|---|

✓ indicates that the variable is included in the multivariate model

ACS = acute coronary syndrome; ASA = aspirin; APT = antiplatelet treatment; AUC = area under the curve; BMI: body mass index; CAD = coronary artery disease; DAPT = dual antiplatelet treatment; HBR: high bleeding risk; NA = not assessed; OAC = oral anticoagulation

\*The DAPT score is not purely a bleeding risk score, rather a score to predict benefit vs. harm of prolonged dual antiplatelet therapy (> one year) in patients after PCI. As such, it integrates covariates independently associated with bleeding (but not ischemic) risk and vice versa.

**Supplementary table 5. Recent large non-randomized head-to-head comparisons of OAC therapies**

| Author                               | OAC evaluated                                     | Patients, n | Statistical adjustment | Main outcome                                                                                                                                                       |
|--------------------------------------|---------------------------------------------------|-------------|------------------------|--------------------------------------------------------------------------------------------------------------------------------------------------------------------|
| Noseworthy P.A. et al. <sup>17</sup> | Dabigatran<br>Rivaroxaban<br>Apixaban             | 57,788      | PSM                    | Similar efficacy<br>Apixaban: ↓ major bleeding vs. rivaroxaban or dabigatran<br>Rivaroxaban: ↑ major bleeding vs. dabigatran                                       |
| Lip G.Y. et al. <sup>18</sup>        | Dabigatran<br>Rivaroxaban<br>Apixaban<br>Warfarin | 45,361      | PSM                    | Rivaroxaban: ↑ major bleeding vs. apixaban                                                                                                                         |
| Hernandez I. et al. <sup>19</sup>    | Dabigatran<br>Rivaroxaban                         | 17,507      | PSW                    | Similar efficacy for stroke<br>Rivaroxaban: ↑ major bleeding vs. dabigatran                                                                                        |
| Hernandez I. et al. <sup>20</sup>    | Apixaban<br>Warfarin<br>No OAC                    | 42,952      | MA                     | Similar efficacy<br>Rivaroxaban: ↑ major bleeding vs. dabigatran or apixaban                                                                                       |
| Vinogradova Y. et al. <sup>21</sup>  | Dabigatran<br>Rivaroxaban<br>Apixaban<br>Warfarin | 196,061     | MA, PSW                | Apixaban: ↓ major bleeding, intracranial bleeding, gastrointestinal bleeding vs. warfarin<br>Rivaroxaban and low dose apixaban: ↑ all-cause mortality vs. warfarin |
| Deitelzweig S. et al. <sup>22</sup>  | Dabigatran<br>Rivaroxaban<br>Apixaban             | 194,532     | PSM                    | Apixaban ↓ stroke or systemic embolism and major bleeding than dabigatran or rivaroxaban<br>Rivaroxaban ↑ major bleeding vs dabigatran                             |

OAC = oral anticoagulation; MA = multivariable adjustment; PSM = propensity score matching; PSW = propensity score weighting



**Supplementary table 6. Risk factors for bleeding specific to cancer patients**

|                                                                                                   |                             |
|---------------------------------------------------------------------------------------------------|-----------------------------|
| Actively bleeding solid tumors                                                                    | Direct effect               |
| Intracerebral metastases                                                                          |                             |
| Acute myeloid leukemia                                                                            | Systemic bleeding diathesis |
| Thrombocytopenia                                                                                  |                             |
| Platelet dysfunction                                                                              |                             |
| Acquired von Willebrand syndrome,<br>coagulation factor deficiencies or presence<br>of inhibitors |                             |
| Disseminated intravascular coagulation                                                            |                             |
| Cancer Surgery                                                                                    | Effect of treatment         |
| Myelosuppressive chemotherapy                                                                     |                             |
| Mucositis                                                                                         |                             |
| Use of VEGF receptor tyrosine-kinase<br>inhibitors                                                |                             |
| Hyperfibrinolysis in hematological<br>malignancies or tumor lysis syndrome                        |                             |
| Hematopoietic stem cell transplantation                                                           |                             |

Data from Kamphuisen P.W. et al.<sup>23</sup>

## Bleeding definitions referred to in the manuscript

1. **ACTION Registry-defined in-hospital major bleeding**<sup>24</sup>: absolute hemoglobin decrease  $\geq 4$  g/dl (baseline to nadir), intracranial hemorrhage, documented or suspected retroperitoneal bleed, any blood transfusion with baseline hemoglobin  $\geq 9$  g/dl, or any transfusion with hemoglobin  $< 9$  g/dl and a suspected bleeding event
  
2. **ACUITY-HORIZONS major bleeding**<sup>25, 26</sup>: intracranial, retroperitoneal, or intraocular bleeding, access site hemorrhage requiring intervention, hematoma  $\geq 5$  cm in diameter, reduction in hemoglobin of  $\geq 4$  g/dl without or  $\geq 3$  g/dl with an overt bleeding source, reoperation for bleeding, or blood product transfusion
  
3. **BARC 3 or 5 bleeding**<sup>27</sup>:  

Type 3: clinical, laboratory, and/or imaging evidence of bleeding with specific healthcare provider responses, as listed below:

  - a. Type 3a
    - Any transfusion with overt bleeding
    - Overt bleeding plus hemoglobin drop  $\geq 3$  to  $< 5$  g/dL (provided hemoglobin drop is related to bleeding). Hemoglobin drop should be corrected for intercurrent transfusion in which 1 U packed red blood cells or 1 U whole blood would be expected to increase hemoglobin by 1 g/dL.
  
  - b. Type 3b
    - Overt bleeding plus hemoglobin drop  $\geq 5$  g/dL (provided hemoglobin drop is related to bleed).

- Cardiac tamponade
- Bleeding requiring surgical intervention for control (excluding dental/nasal/skin/hemorrhoid)
- Bleeding requiring intravenous vasoactive drugs

c. Type 3c

- Intracranial hemorrhage (does not include microbleeds or hemorrhagic transformation; does include intraspinal); subcategories confirmed by autopsy, imaging, or lumbar puncture
- Intraocular bleed compromising vision

Type 5: fatal bleeding

- Type 5a  
Probable fatal bleeding; no autopsy or imaging confirmation but clinically suspicious
- Type 5b  
Definite fatal bleeding; overt bleeding or autopsy or imaging confirmation

4. **BleeMACS serious spontaneous bleeding**<sup>16</sup>: any intracranial bleeding or any other bleeding leading to hospitalization and/or red blood transfusion ( $\geq 1$  unit), occurring within the first year after hospital discharge. Bleeding and/or red blood transfusions related to procedures or surgeries were not considered spontaneous bleeding and were not included

5. **CONCERN-defined recurrent upper gastro-intestinal bleeding**<sup>28</sup>: hematemesis or melena or a hemoglobin decrease of  $\geq 2$  g/dL in the presence of endoscopy-proven ulcers or bleeding erosions

6. **GUSTO**<sup>29</sup>:

**Moderate bleeding**

- bleeding requiring blood transfusion but not resulting in hemodynamic compromise

**Severe or life-threatening bleeding**

- intracerebral hemorrhage
- bleeding resulting in substantial hemodynamic compromise requiring treatment

7. **International Society on Thrombosis and Haemostasis (ISTH) bleeding definitions**<sup>30, 31</sup>:

Major bleeding (in non-surgical patients): bleeding that result in death, are life-threatening, cause chronic sequelae or consume major health-care resources

- Fatal bleeding, and/or
- Symptomatic bleeding in a critical area or organ, such as intracranial, intraspinal, intraocular, retroperitoneal, intra-articular or pericardial, or intramuscular with compartment syndrome, and/or
- Bleeding causing a fall in hemoglobin level of 20 g/L (1.24 mmol/L) or more, or leading to transfusion of two or more units of whole blood or red cells

8. **NCDR Cath PCI post-procedural bleeding after PCI<sup>32</sup>**: access site, retroperitoneal, gastrointestinal, or genitourinary bleeding, or other
  
9. **OPTIMIZE<sup>33</sup>**: protocol-defined major bleeding was based on a combination of 2 different bleeding criteria: modified major REPLACE-2 (Randomized Evaluation of PCI Linking Angiomax to Reduced Clinical Events) and severe or life-threatening GUSTO (Global Utilization of Streptokinase and Tissue Plasminogen Activator for Occluded Coronary Arteries) criteria (intracranial, intraocular, or retroperitoneal hemorrhage; clinically overt blood loss resulting in a decrease in hemoglobin of more than 3 g/dL, any decrease in hemoglobin level of more than 4 g/dL, or transfusion of 1 or more units of packed red blood cells or whole blood; or either intracranial hemorrhage or bleeding that caused hemodynamic compromise and required intervention)
  
10. **POISE-2 major bleeding<sup>34</sup>**: hemoglobin  $\leq 7$ g/dL or a hemoglobin drop of  $\geq 5$  g/dL plus transfusion of  $\geq 2$  units; transfusion of  $\geq 4$  units in 24 hours; retroperitoneal, intraspinal, or intraocular bleeding or embolization, superficial vascular repair, or nasal packing
  
11. **REACH<sup>11</sup>**: protocol-defined serious bleeding was defined as non-fatal hemorrhagic stroke or bleeding leading to hospitalization and transfusion
  
12. **STEEPLE<sup>35</sup>** (bleeding endpoint in ARCTIC): major bleeding was defined as bleeding that met at least one of the following criteria: fatal bleeding, retroperitoneal, intracranial or intraocular bleeding, bleeding that causes hemodynamic compromise requiring specific treatment, bleeding requiring intervention (surgical or endoscopic), or decompression of

a closed space to stop or control the event, clinically overt bleeding requiring any transfusion of  $\geq 1$  unit of packed red cells or whole blood, clinically overt bleeding causing a decrease in hemoglobin of  $\geq 3$  g/dl (or if hemoglobin level not available, a decrease in hematocrit of  $\geq 10\%$ )

**13. TIMI bleeding<sup>36, 37</sup>:**

Non-CABG related bleeding

Major

- Any intracranial bleeding (excluding micro-hemorrhages  $<10$  mm evident only on gradient-echo MRI)
- Clinically overt signs of hemorrhage associated with a drop in hemoglobin of  $\geq 5$  g/dL
- Fatal bleeding (bleeding that directly results in death within 7 d)

Minor

- Clinically overt (including imaging), resulting in hemoglobin drop of 3 to  $<5$  g/dL

**14. Chan et al.<sup>38</sup>:** recurrent ulcer bleeding was defined as hematemesis or melena

documented by the admitting physician, with ulcers or bleeding erosions confirmed on endoscopy, or a decrease in the hemoglobin level of at least 2 g per deciliter in the presence of endoscopically documented ulcers or bleeding erosions

**15. Potts et al.<sup>39</sup>:** in-hospital bleeding was defined using ICD-9-CM codes for post-procedural complications and included gastrointestinal (578.9), retroperitoneal (568.81), intracranial

(432.9), intracerebral haemorrhage (431), unspecified haemorrhage (459.0), and whether a blood transfusion was required (V58.2, 99.0x [procedure]).

16. **Sung et al.**<sup>40</sup>: recurrent ulcer bleeding was defined as the presence of  $\geq 1$  or more of the following clinical features (recurrent hematemesis with vomiting of fresh blood; melena after a normal stool; a decrease in hemoglobin level greater than 2 g/dL within 24 hours, despite 2 or more units of blood transfused; or unstable hemodynamic status (systolic blood pressure  $\leq 90$  mm Hg or pulse  $\geq 110$  beats/min) after achieving stabilization) and confirmed by endoscopic evidence, which included arterial spurter, nonbleeding visible vessel, adherent clot, or fresh blood in the stomach.

17. **Villanueva et al.**<sup>41</sup>: in-hospital bleeding was defined as hematemesis or fresh melena associated with signs of hemodynamic instability (systolic blood pressure  $< 100$  mmHg and/or pulse rate  $> 100$  bpm) or a hemoglobin drop of  $\geq 2$  g/dl within a 6-hour period

#### **Bleeding definitions in stroke trials (Table 6):**

Life-threatening bleeding in **MATCH** was defined as any fatal bleeding event; a drop in hemoglobin of  $\geq 5$  g/dL; significant hypotension with need for inotropes (hemorrhagic shock); symptomatic intracranial hemorrhage, or transfusion of  $\geq 4$  units of red-blood cells or equivalent amount of whole blood.<sup>42</sup>

Major bleeding in **POINT** was defined as symptomatic ICH, intraocular bleeding causing vision loss, transfusion of  $\geq 2$  units of red cells or an equivalent amount of whole blood, hospitalization or prolongation of an existing hospitalization, or death due to hemorrhage.<sup>43</sup>

Major bleeding in **PRoFESS** was defined as a hemorrhagic event that resulted in clinically significant disability, symptomatic intracranial hemorrhage, intraocular bleeding causing loss of vision, the need for a transfusion of  $\geq 2$  units of red cells or the equivalent amount of whole blood, or the need for hospitalization.<sup>44</sup>

Major bleeding in **SPS3** was defined as intracranial hemorrhage (included those in intracerebral, subdural, epidural, and subarachnoid locations as documented on neuroimaging) and/or serious or life-threatening bleeding requiring transfusion of red cells or surgery or resulting in permanent functional sequelae or death.<sup>45</sup>



## References

1. Fajadet J, Wijns W, Laarman GJ, Kuck KH, Ormiston J, Munzel T, Popma JJ, Fitzgerald PJ, Bonan R and Kuntz RE. Randomized, double-blind, multicenter study of the Endeavor zotarolimus-eluting phosphorylcholine-encapsulated stent for treatment of native coronary artery lesions: clinical and angiographic results of the ENDEAVOR II trial. *Circulation*. 2006;114:798-806.
2. Yeung AC, Leon MB, Jain A, Tolleson TR, Spriggs DJ, Mc Laurin BT, Popma JJ, Fitzgerald PJ, Cutlip DE, Massaro JM and Mauri L. Clinical Evaluation of the Resolute Zotarolimus-Eluting Coronary Stent System in the Treatment of De Novo Lesions in Native Coronary Arteries The RESOLUTE US Clinical Trial. *J Am Coll Cardiol*. 2011;57:1778-1783.
3. Stone GW, Midei M, Newman W, Sanz M, Hermiller JB, Williams J, Farhat N, Mahaffey KW, Cutlip DE, Fitzgerald PJ, Sood P, Su X and Lansky AJ. Comparison of an everolimus-eluting stent and a paclitaxel-eluting stent in patients with coronary artery disease: a randomized trial. *JAMA*. 2008;299:1903-1913.
4. Stone GW, Teirstein PS, Meredith IT, Farah B, Dubois CL, Feldman RL, Dens J, Hagiwara N, Allocco DJ, Dawkins KD and Investigators PT. A prospective, randomized evaluation of a novel everolimus-eluting coronary stent: the PLATINUM (a Prospective, Randomized, Multicenter Trial to Assess an Everolimus-Eluting Coronary Stent System [PROMUS Element] for the Treatment of Up to Two de Novo Coronary Artery Lesions) trial. *J Am Coll Cardiol*. 2011;57:1700-1708.
5. Kereiakes DJ, Meredith IT, Windecker S, Lee Jobe R, Mehta SR, Sarembock IJ, Feldman RL, Stein B, Dubois C, Grady T, Saito S, Kimura T, Christen T, Allocco DJ and Dawkins KD. Efficacy and safety of a novel bioabsorbable polymer-coated, everolimus-eluting coronary stent: the EVOLVE II Randomized Trial. *Circ Cardiovasc Interv*. 2015;8:e002372.
6. Kandzari DE, Smits PC, Love MP, Ben-Yehuda O, Banai S, Robinson SD, Jonas M, Kornowski R, Bagur R, Iniguez A, Danenberg H, Feldman R, Jauhar R, Chandna H, Parikh M, Perlman GY, Balcells M, Markham P, Ozan MO, Genereux P, Edelman ER, Leon MB and Stone GW. Randomized Comparison of Ridaforolimus- and Zotarolimus-Eluting Coronary Stents in Patients With Coronary Artery Disease: Primary Results From the BIONICS Trial (BioNIR Ridaforolimus-Eluting Coronary Stent System in Coronary Stenosis). *Circulation*. 2017;136:1304-1314.
7. Kandzari DE, Mauri L, Koolen JJ, Massaro JM, Doros G, Garcia-Garcia HM, Bennett J, Roguin A, Gharib EG, Cutlip DE, Waksman R and Investigators BV. Ultrathin, bioresorbable polymer sirolimus-eluting stents versus thin, durable polymer everolimus-eluting stents in patients undergoing coronary revascularisation (BIOFLOW V): a randomised trial. *Lancet*. 2017;390:1843-1852.
8. Urban P, Meredith IT, Abizaid A, Pocock SJ, Carrie D, Naber C, Lipiecki J, Richardt G, Iniguez A, Brunel P, Valdes-Chavarri M, Garot P, Talwar S, Berland J, Abdellaoui M, Eberli F, Oldroyd K, Zambahari R, Gregson J, Greene S, Stoll HP, Morice MC and Investigators LF. Polymer-free Drug-Coated Coronary Stents in Patients at High Bleeding Risk. *N Engl J Med*. 2015;373:2038-2047.
9. Ariotti S, Adamo M, Costa F, Patialiakas A, Briguori C, Thury A, Colangelo S, Campo G, Tebaldi M, Ungi I, Tondi S, Roffi M, Menozzi A, de Cesare N, Garbo R, Meliga E, Testa L, Gabriel HM, Ferlini M, Vranckx P, Valgimigli M and Investigators Z. Is Bare-Metal Stent Implantation Still Justifiable in High Bleeding Risk Patients Undergoing Percutaneous Coronary Intervention?: A Pre-Specified Analysis From the ZEUS Trial. *JACC Cardiovasc Interv*. 2016;9:426-436.
10. Varenne O, Cook S, Sideris G, Kedev S, Cuisset T, Carrie D, Hovasse T, Garot P, El Mahmoud R, Spaulding C, Helft G, Diaz Fernandez JF, Brugaletta S, Pinar-Bermudez E, Mauri Ferre J, Commeau P, Teiger E, Bogaerts K, Sabate M, Morice MC, Sinnaeve PR and investigators S. Drug-eluting stents in elderly patients with coronary artery disease (SENIOR): a randomised single-blind trial. *Lancet*. 2018;391:41-50.
11. Ducrocq G, Wallace JS, Baron G, Ravaud P, Alberts MJ, Wilson PW, Ohman EM, Brennan DM, D'Agostino RB, Bhatt DL and Steg PG. Risk score to predict serious bleeding in stable outpatients with or at risk of atherothrombosis. *Eur Heart J*. 2010;31:1257-1265.
12. de Groot NL, Hagens MP, Smeets HM, Steyerberg EW, Siersema PD and van Oijen MG. Primary non-variceal upper gastrointestinal bleeding in NSAID and low-dose aspirin users:

- development and validation of risk scores for either medication in two large Dutch cohorts. *J Gastroenterol*. 2014;49:245-253.
13. Yeh RW, Secemsky EA, Kereiakes DJ, Normand SL, Gershlick AH, Cohen DJ, Spertus JA, Steg PG, Cutlip DE, Rinaldi MJ, Camenzind E, Wijns W, Apruzzese PK, Song Y, Massaro JM and Mauri L. Development and Validation of a Prediction Rule for Benefit and Harm of Dual Antiplatelet Therapy Beyond 1 Year After Percutaneous Coronary Intervention. *Jama*. 2016;315:1735-1749.
  14. Baber U, Mehran R, Giustino G, Cohen DJ, Henry TD, Sartori S, Ariti C, Litherland C, Dangas G, Gibson CM, Krucoff MW, Moliterno DJ, Kirtane AJ, Stone GW, Colombo A, Chieffo A, Kini AS, Witzenbichler B, Weisz G, Steg PG and Pocock S. Coronary Thrombosis and Major Bleeding After PCI With Drug-Eluting Stents: Risk Scores From PARIS. *J Am Coll Cardiol*. 2016;67:2224-2234.
  15. Costa F, van Klaveren D, James S, Heg D, Raber L, Feres F, Pilgrim T, Hong MK, Kim HS, Colombo A, Steg PG, Zanchin T, Palmerini T, Wallentin L, Bhatt DL, Stone GW, Windecker S, Steyerberg EW and Valgimigli M. Derivation and validation of the predicting bleeding complications in patients undergoing stent implantation and subsequent dual antiplatelet therapy (PRECISE-DAPT) score: a pooled analysis of individual-patient datasets from clinical trials. *Lancet*. 2017;389:1025-1034.
  16. Raposeiras-Roubin S, Faxen J, Iniguez-Romo A, Henriques JPS, D'Ascenzo F, Saucedo J, Szummer K, Jernberg T, James SK, Juanatey JRG, Wilton SB, Kikkert WJ, Nunez-Gil I, Ariza-Sole A, Song X, Alexopoulos D, Liebetrau C, Kawaji T, Moretti C, Huczek Z, Nie SP, Fujii T, Correia L, Kawashiri MA, Caneiro-Queija B, Cobas-Paz R, Acuna JMG, Southern D, Alfonso E, Terol B, Garay A, Zhang D, Chen Y, Xanthopoulou I, Osman N, Mollmann H, Shiomi H, Giordana F, Gaita F, Kowara M, Filipiak K, Wang X, Yan Y, Fan JY, Ikari Y, Nakahayashi T, Sakata K, Yamagishi M, Kalpak O, Kedev S, Rivera-Asenjo D and Abu-Assi E. Development and external validation of a post-discharge bleeding risk score in patients with acute coronary syndrome: The BleeMACS score. *Int J Cardiol*. 2018;254:10-15.
  17. Noseworthy PA, Yao X, Abraham NS, Sangaralingham LR, McBane RD and Shah ND. Direct Comparison of Dabigatran, Rivaroxaban, and Apixaban for Effectiveness and Safety in Nonvalvular Atrial Fibrillation. *Chest*. 2016;150:1302-1312.
  18. Lip GY, Keshishian A, Kamble S, Pan X, Mardekian J, Horblyuk R and Hamilton M. Real-world comparison of major bleeding risk among non-valvular atrial fibrillation patients initiated on apixaban, dabigatran, rivaroxaban, or warfarin. A propensity score matched analysis. *Thromb Haemost*. 2016;116:975-986.
  19. Hernandez I and Zhang Y. Comparing Stroke and Bleeding with Rivaroxaban and Dabigatran in Atrial Fibrillation: Analysis of the US Medicare Part D Data. *Am J Cardiovasc Drugs*. 2017;17:37-47.
  20. Hernandez I, Zhang Y and Saba S. Comparison of the Effectiveness and Safety of Apixaban, Dabigatran, Rivaroxaban, and Warfarin in Newly Diagnosed Atrial Fibrillation. *Am J Cardiol*. 2017;120:1813-1819.
  21. Vinogradova Y, Coupland C, Hill T and Hippisley-Cox J. Risks and benefits of direct oral anticoagulants versus warfarin in a real world setting: cohort study in primary care. *BMJ*. 2018;362:k2505.
  22. Deitelzweig S, Keshishian A, Li X, Hamilton M, Masseria C, Gupta K, Luo X, Mardekian J, Friend K, Nadkarni A, Pan X, Baser O and Lip GYH. Comparison of effectiveness, safety, and the net clinical outcome between difference direct oral anticoagulants in 162,707 nonvalvular atrial fibrillation patients treated in US clinical practice. *J Am Coll Cardiol*. 2018;71:DOI: 10.1016/S0735-1097(1018)30816-30817 (abstract)
  23. Kamphuisen PW and Beyer-Westendorf J. Bleeding complications during anticoagulant treatment in patients with cancer. *Thromb Res*. 2014;133 Suppl 2:S49-55.
  24. Mathews R, Peterson ED, Chen AY, Wang TY, Chin CT, Fonarow GC, Cannon CP, Rumsfeld JS, Roe MT and Alexander KP. In-hospital major bleeding during ST-elevation and non-ST-elevation myocardial infarction care: derivation and validation of a model from the ACTION Registry(R)-GWTG. *Am J Cardiol*. 2011;107:1136-1143.
  25. Amlani S, Nadarajah T, Afzal R, Pal-Sayal R, Eikelboom JW and Natarajan MK. Mortality and morbidity following a major bleed in a registry population with acute ST elevation myocardial infarction. *J Thromb Thrombolysis*. 2010;30:434-440.

26. Stone GW, Midei M, Newman W, Sanz M, Hermiller JB, Williams J, Farhat N, Caputo R, Xenopoulos N, Applegate R, Gordon P, White RM, Sudhir K, Cutlip DE and Petersen JL. Randomized comparison of everolimus-eluting and paclitaxel-eluting stents: two-year clinical follow-up from the Clinical Evaluation of the Xience V Everolimus Eluting Coronary Stent System in the Treatment of Patients with de novo Native Coronary Artery Lesions (SPIRIT) III trial. *Circulation*. 2009;119:680-686.
27. Mehran R, Rao SV, Bhatt DL, Gibson CM, Caixeta A, Eikelboom J, Kaul S, Wiviott SD, Menon V, Nikolsky E, Serebruany V, Valgimigli M, Vranckx P, Taggart D, Sabik JF, Cutlip DE, Krucoff MW, Ohman EM, Steg PG and White H. Standardized bleeding definitions for cardiovascular clinical trials: a consensus report from the Bleeding Academic Research Consortium. *Circulation*. 2011;123:2736-2747.
28. Chan FKL, Ching JYL, Tse YK, Lam K, Wong GLH, Ng SC, Lee V, Au KWL, Cheong PK, Suen BY, Chan H, Kee KM, Lo A, Wong VWS, Wu JCY and Kyaw MH. Gastrointestinal safety of celecoxib versus naproxen in patients with cardiothrombotic diseases and arthritis after upper gastrointestinal bleeding (CONCERN): an industry-independent, double-blind, double-dummy, randomised trial. *Lancet*. 2017;389:2375-2382.
29. Sabatine MS, Morrow DA, Giugliano RP, Burton PB, Murphy SA, McCabe CH, Gibson CM and Braunwald E. Association of hemoglobin levels with clinical outcomes in acute coronary syndromes. *Circulation*. 2005;111:2042-2049.
30. Schulman S and Kearon C. Definition of major bleeding in clinical investigations of antihemostatic medicinal products in non-surgical patients. *J Thromb Haemost*. 2005;3:692-694.
31. Kaatz S, Ahmad D, Spyropoulos AC and Schulman S. Definition of clinically relevant non-major bleeding in studies of anticoagulants in atrial fibrillation and venous thromboembolic disease in non-surgical patients: communication from the SSC of the ISTH. *J Thromb Haemost*. 2015;13:2119-2126.
32. Rao SV, Dai D, Subherwal S, Weintraub WS, Brindis RS, Messenger JC, Lopes RD and Peterson ED. Association between periprocedural bleeding and long-term outcomes following percutaneous coronary intervention in older patients. *JACC Cardiovasc Interv*. 2012;5:958-965.
33. Feres F, Costa RA, Abizaid A, Leon MB, Marin-Neto JA, Botelho RV, King SB, 3rd, Negoita M, Liu M, de Paula JE, Mangione JA, Meireles GX, Castello HJ, Jr., Nicolela EL, Jr., Perin MA, Devito FS, Labrunie A, Salvadori D, Jr., Gusmao M, Staico R, Costa JR, Jr., de Castro JP, Abizaid AS and Bhatt DL. Three vs twelve months of dual antiplatelet therapy after zotarolimus-eluting stents: the OPTIMIZE randomized trial. *Jama*. 2013;310:2510-2522.
34. Devereaux PJ, Mrkobra M, Sessler DI, Leslie K, Alonso-Coello P, Kurz A, Villar JC, Sigamani A, Biccard BM, Meyhoff CS, Parlow JL, Guyatt G, Robinson A, Garg AX, Rodseth RN, Botto F, Lurati Buse G, Xavier D, Chan MT, Tiboni M, Cook D, Kumar PA, Forget P, Malaga G, Fleischmann E, Amir M, Eikelboom J, Mizera R, Torres D, Wang CY, VanHelder T, Paniagua P, Berwanger O, Srinathan S, Graham M, Pasin L, Le Manach Y, Gao P, Pogue J, Whitlock R, Lamy A, Kearon C, Baigent C, Chow C, Pettit S, Chrolavicius S and Yusuf S. Aspirin in patients undergoing noncardiac surgery. *N Engl J Med*. 2014;370:1494-1503.
35. Montalescot G, White HD, Gallo R, Cohen M, Steg PG, Aylward PE, Bode C, Chiariello M, King SB, 3rd, Harrington RA, Desmet WJ, Macaya C and Steinhubl SR. Enoxaparin versus unfractionated heparin in elective percutaneous coronary intervention. *N Engl J Med*. 2006;355:1006-1017.
36. Mega JL, Braunwald E, Mohanavelu S, Burton P, Poulter R, Misselwitz F, Hricak V, Barnathan ES, Bordes P, Witkowski A, Markov V, Oppenheimer L and Gibson CM. Rivaroxaban versus placebo in patients with acute coronary syndromes (ATLAS ACS-TIMI 46): a randomised, double-blind, phase II trial. *Lancet*. 2009;374:29-38.
37. Sabatine MS, Antman EM, Widimsky P, Ebrahim IO, Kiss RG, Saaiman A, Polasek R, Contant CF, McCabe CH and Braunwald E. Otamixaban for the treatment of patients with non-ST-elevation acute coronary syndromes (SEPIA-ACS1 TIMI 42): a randomised, double-blind, active-controlled, phase 2 trial. *Lancet*. 2009;374:787-795.
38. Chan FK, Ching JY, Hung LC, Wong VW, Leung VK, Kung NN, Hui AJ, Wu JC, Leung WK, Lee VW, Lee KK, Lee YT, Lau JY, To KF, Chan HL, Chung SC and Sung JJ. Clopidogrel versus aspirin and esomeprazole to prevent recurrent ulcer bleeding. *N Engl J Med*. 2005;352:238-244.

39. Potts JE, Iliescu CA, Lopez Mattei JC, Martinez SC, Holmvang L, Ludman P, De Belder MA, Kwok CS, Rashid M, Fischman DL and Mamas MA. Percutaneous coronary intervention in cancer patients: a report of the prevalence and outcomes in the United States. *Eur Heart J*. 2018;doi: 10.1093/eurheartj/ehy769 (Epub ahead of print).
40. Sung JJ, Lau JY, Ching JY, Wu JC, Lee YT, Chiu PW, Leung VK, Wong VW and Chan FK. Continuation of low-dose aspirin therapy in peptic ulcer bleeding: a randomized trial. *Ann Intern Med*. 2010;152:1-9.
41. Villanueva C, Colomo A, Bosch A, Concepcion M, Hernandez-Gea V, Aracil C, Graupera I, Poca M, Alvarez-Urturi C, Gordillo J, Guarner-Argente C, Santalo M, Muniz E and Guarner C. Transfusion strategies for acute upper gastrointestinal bleeding. *N Engl J Med*. 2013;368:11-21.
42. Diener HC, Bogousslavsky J, Brass LM, Cimminiello C, Csiba L, Kaste M, Leys D, Matias-Guiu J and Rupprecht HJ. Aspirin and clopidogrel compared with clopidogrel alone after recent ischaemic stroke or transient ischaemic attack in high-risk patients (MATCH): randomised, double-blind, placebo-controlled trial. *Lancet*. 2004;364:331-337.
43. Johnston SC, Easton JD, Farrant M, Barsan W, Conwit RA, Elm JJ, Kim AS, Lindblad AS, Palesch YY, Clinical Research Collaboration NETTN and the PI. Clopidogrel and Aspirin in Acute Ischemic Stroke and High-Risk TIA. *N Engl J Med*. 2018;379:215-225.
44. Sacco RL, Diener HC, Yusuf S, Cotton D, Ounpuu S, Lawton WA, Palesch Y, Martin RH, Albers GW, Bath P, Bornstein N, Chan BP, Chen ST, Cunha L, Dahlof B, De Keyser J, Donnan GA, Estol C, Gorelick P, Gu V, Hermansson K, Hilbrich L, Kaste M, Lu C, Machnig T, Pais P, Roberts R, Skvortsova V, Teal P, Toni D, Vandermaelen C, Voigt T, Weber M and Yoon BW. Aspirin and extended-release dipyridamole versus clopidogrel for recurrent stroke. *N Engl J Med*. 2008;359:1238-1251.
45. Benavente OR, Hart RG, McClure LA, Szychowski JM, Coffey CS and Pearce LA. Effects of clopidogrel added to aspirin in patients with recent lacunar stroke. *N Engl J Med*. 2012;367:817-825.
